# Supplementary material
Source: publisher figshare collection journal article supplement (https://gsajournals.figshare.com/articles/dataset/_/9948260)
Supplement: Supplementary file 1 [file 1]

|           |                                                                |     |
|-----------|----------------------------------------------------------------|-----|
| Human     | MPVARSWVCRKTYVTPRRPFKSRLDQELKLIGEYGLRNKREVVRVKFTLAKIRKAAREL    |     |
| Zebrafish | MPVAKTWVCSKTYVTPRRPFKSRLDQELRLIGEYGLRNKREVVRVKFTLAKIRKAAREL    |     |
|           | ****.***                                                       |     |
| Human     | LTLDKDPRLFEQNALLRRLVRIGVLDEGKMKLDYILGLKIEDFLERRLQTQVFKLGLA     |     |
| Zebrafish | LTLDKDPKRLFEQNALLRRLVRIGVLDEGKMKLDYILGLKVEDFLERRLQTQVFKLGLA    |     |
|           | *****.*****                                                    |     |
| Human     | KSIHHARVLIRQRHIRVRKQVNVNIPSFIVRLDSQKHIDFSLRSPYGGGRPRGVKRKNACK  |     |
| Zebrafish | KSIHHARVLIRQRHIRVRKQVNVNIPSFVVRRLDSQKHIDFSLRSPYGGGRPRGVKRKNACK |     |
|           | *****.*****                                                    |     |
| Human     | GQGGAGAGDDEEED                                                 | 194 |
| Zebrafish | AQGGGGGGDDEEED                                                 | 194 |
|           | ***.******                                                     |     |

**A**

□ UTR  
■ exon

**B**

Amino acid change

*rps9* WT: CTGGT GCGTATTGGAGTGCTGGATG AGGGA LVRIGVLDEG (194 aa)  
*rps9<sup>la489</sup>*: CTGGT GCGTATTGGAGTGC - - - ATG AGGGA LVRIGVHEG (193 aa)  
*rps9<sup>la490</sup>*: CTGGT GCGTATTGGAG- - - - - TG AGGGA LVRIGVRER\* (89 aa)  
*rps9<sup>la491</sup>*: CTGGT G- - - A- - - G- G- GA AGGATG AGGGA LVREG\* (85 aa)

**C**

CTGGT GCGTATTGGAGTG AGGGA  
C T G G T G C G T A T T G G A G T G A G G G

*rps9<sup>la490</sup>* mutant reverse primer sequencing

CTGGT GAGGGA AGGATG AGGGA  
T C C C T C A C A G A C G C C T G A G

*rps9<sup>la491</sup>* mutant reverse primer sequencing

(A) Illustration of *rps9* locus. (B) Gene editing details for each mutant line. Targeting sequence (blue), insertion (orange), deletion (blue dashes), PAM region (red) are indicated; \* represents the end of amino acid sequence. (C) Sequencing results for two mutant lines with frameshift indels.

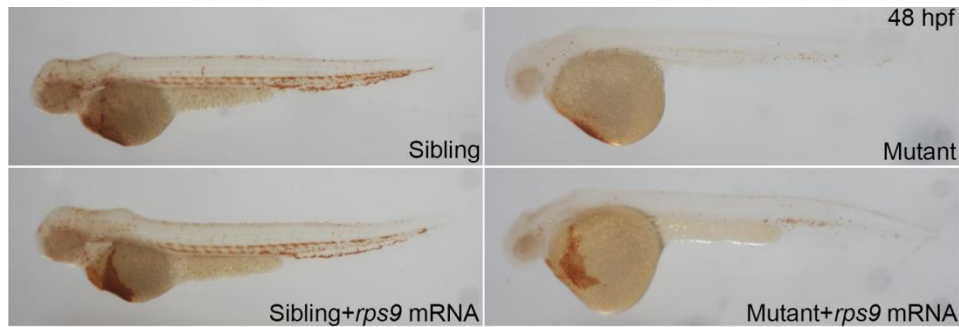

**Figure S3.** Hemoglobin level is recovered with *rps9* mRNA in *rps9* deficient embryos.

Siblings injected with *rps9* mRNA (400 pg) display a similar hemoglobin level to the sibling without treatment, while mutants injected with *rps9* mRNA (400 pg) show a moderate increase of red blood cells.

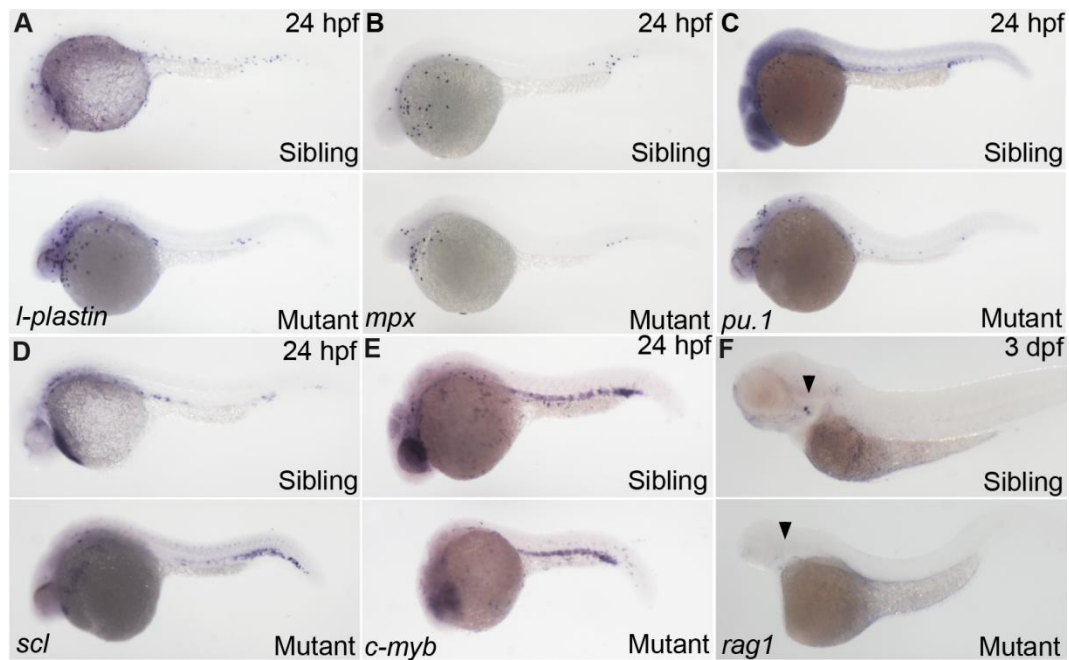

**Figure S4.** In situ hybridization of *l-plastin*, *mpx*, *pu.1*, *scl*, *c-myb* and *rag1* in *rps9* mutants.

(A-C) Myeloid cells are not affected by *rps9* deficiency, as indicated by three myeloid markers including *l-plastin*, *mpx*, and *pu.1*. (D-E) Hematopoietic stem cells appear normal, as shown by two markers, *scl* and *c-myb*. (F) Lymphoid lineage is impaired in *rps9* mutant, which is demonstrated by the decreased level of *rag1* expression (arrowheads).

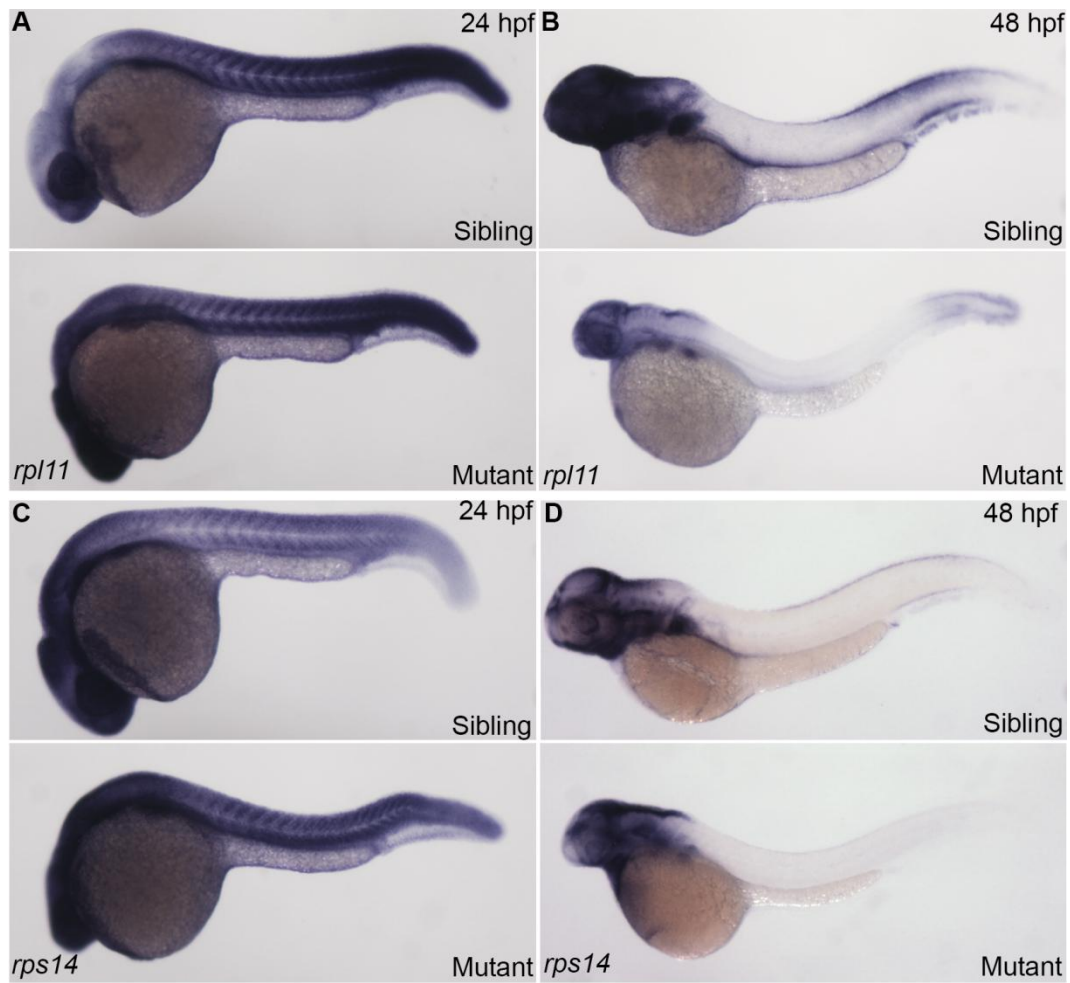

**Figure S5.** Expression of other ribosomal protein genes is not affected in *rps9* mutants.

(A-D) Expression of *rpl11* (ribosome large subunit) and *rps14* (ribosome small subunit) is not altered in *rps9* mutants.

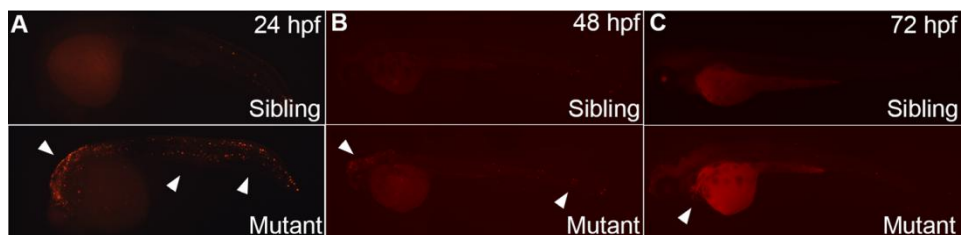

**Figure S6.** Apoptosis is elevated in *rps9* mutant.

(A-C) TUNNEL staining is performed using TMR-red at 24 hpf (A), 48 hpf (B), and 72 hpf (C). Arrowheads indicate the sites of apoptosis.

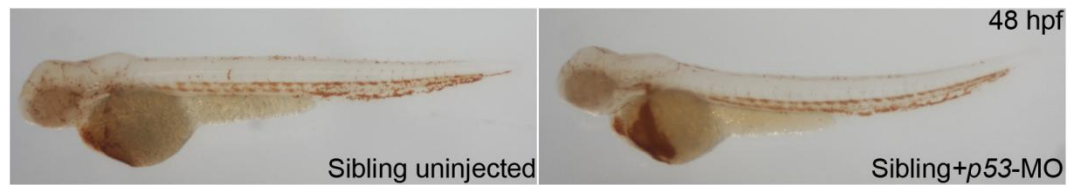

**Figure S7.** Erythroid level is not affected by knockdown of *p53* under normal conditions.

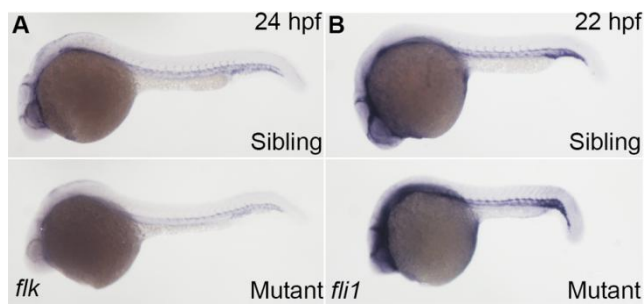

**Figure S8.** Intersomitic vessels are impaired in *rps9* mutants.

(A-B) In situ hybridization of two vascular markers, *flk* and *fli1*, in *rps9* mutants.

**Movie S1.** Circulation of *rps9* mutant at 3 dpf.

**Movie S2.** Circulation of *rps9* sibling at 3 dpf.
